# Supplementary material for: Biofilms and antibiotic susceptibility of multidrug-resistant bacteria from wild animals
Source: PeerJ. 2018 Jun 12;6:e4974. doi: 10.7717/peerj.4974 (PMC6003395; doi:10.7717/peerj.4974)
Supplement: Supplemental Information 2 [file peerj-06-4974-s003.xlsx]

## Sheet: Data
				24 hours									48 hours									72 hours
				Shewanella putrefacies (AS006C2)	H2O	Broth	Broth	Cells	Cells	Cells	Cells		Shewanella putrefacies (AS006C2)	H2O	Broth	Broth	Cells	Cells				Shewanella putrefacies (AS006C2)	H2O	Broth	Broth	Cells	Cells
				A	1.62805	0.589511	0.645358	1.94093	2.02918	1.69155	1.98823		A	1.82626	0.589511	0.645358	2.96401	3.38498				A	1.47072	0.589511	0.645358	2.583	3.20858
				B	1.43614	0.769278	0.567322	1.85263	1.615	2.02786	1.53794		B	1.75194	0.769278	0.567322	2.92795	3.24475				B	1.61009	0.769278	0.567322	3.43897	4.16002
				C	1.80109	0.819262	0.768335	1.49662	1.76976	1.67431	1.58165		C	1.72921	0.819262	0.768335	2.83426	2.96701				C	1.93256	0.819262	0.768335	2.85431	4.06905
				D	1.52756	0.695733	0.703341	1.46703	1.66657	1.47086	1.53264		D	1.76267	0.695733	0.703341	2.95972	2.87388				D	1.91112	0.695733	0.703341	3.12461	3.21745
				E	1.68301	0.719494	0.705835	1.50824	1.52475	2.14452	2.25922		E	1.70649	0.719494	0.705835	2.96256	3.00765				E	1.91917	0.719494	0.705835	2.69284	4.35817
				F	1.65071	0.773411	0.825309	1.45673	1.50985	1.54333	1.60464		F	1.49738	0.773411	0.825309	2.98921	3.0239				F	1.79754	0.773411	0.825309	2.51721	3.38375
				G	1.71036	0.785037	0.870443	1.36329	1.56208	1.627	1.60198		G	1.36596	0.785037	0.870443	3.22534	3.16213				G	1.76857	0.785037	0.870443	3.04049	4.84787
	ODc	0.969608		H	1.61351	0.65551	0.708724	1.55292	1.81509	1.70634	2.43953		H	1.67631	0.65551	0.708724	3.28107	3.2589				H	1.94765	0.65551	0.708724	2.82036	3.34329
	2*ODc	1.93922		Mean			0.725119				1.70507		Mean			0.725119		3.06671				Média			0.725119		3.35375
	4*ODc	3.87843		Standard Deviation			0.0814964				0.252844		Standard Deviation			0.0814964		0.160999				DesvP			0.0814964		0.655084
				Pseudomonas fluorescens (AS008A1)	H2O	Broth	Broth	Cells	Cells	Cells	Cells		Pseudomonas fluorescens (AS008A1)	H2O	Broth	Broth	Cells	Cells				Pseudomonas fluorescens (AS008A1)	H2O	Broth	Broth	Cells	Cells
				A	1.34091	0.589511	0.645358	1.47711	1.62742	1.88357	2.15142		A	0.96138	0.589511	0.645358	1.15191	1.21748				A	0.954148	0.589511	0.645358	1.20803	2.40654
				B	1.08641	0.769278	0.567322	1.60491	1.66084	1.93787	2.1287		B	1.40952	0.769278	0.567322	1.2516	1.13994				B	1.44975	0.769278	0.567322	1.26894	1.11191
				C	1.22625	0.819262	0.768335	1.45655	1.54216	1.55843	1.81661		C	1.40642	0.819262	0.768335	1.25104	1.13578				C	1.38864	0.819262	0.768335	1.27446	1.10515
				D	1.22801	0.695733	0.703341	1.43607	1.39439	1.5619	2.10526		D	1.34572	0.695733	0.703341	1.16681	1.13217				D	1.66329	0.695733	0.703341	1.16055	1.17227
				E	1.12941	0.719494	0.705835	1.38864	1.48767	1.76187	1.49499		E	1.41509	0.719494	0.705835	1.13464	1.17242				E	1.24873	0.719494	0.705835	1.21239	1.13452
				F	1.16908	0.773411	0.825309	1.55102	1.47073	1.64143	1.68875		F	1.33051	0.773411	0.825309	1.14809	1.25925				F	1.32	0.773411	0.825309	1.07945	1.10033
				G	1.33239	0.785037	0.870443	1.93907	1.62465	1.57281	1.85965		G	1.28683	0.785037	0.870443	1.12569	1.1458				G	1.43297	0.785037	0.870443	1.15563	1.14163
	ODc	0.969608		H	1.33793	0.65551	0.708724	1.47314	1.50055	1.49244	2.17265		H	1.34016	0.65551	0.708724	1.17061	1.13738				H	1.34807	0.65551	0.708724	1.08778	1.10698
	2*ODc	1.93922		Mean			0.725119				1.67073		Mean			0.725119		1.17129				Mean			0.725119		1.23291
	4*ODc	3.87843		Standard Deviation			0.0814964				0.231068		Standard Deviation			0.0814964		0.0451485				Standard Deviation			0.0814964		0.308563
				Klebsiella pneumoniae (AS027A2)	H2O	Broth	Broth	Cells	Cells	Cells	Cells		Klebsiella pneumoniae (AS027A2)	H2O	Broth	Broth	Cells	Cells				Klebsiella pneumoniae (AS027A2)	H2O	Broth	Broth	Cells	Cells
				A	1.64846	0.589511	0.645358	1.0717	1.0946	2.54779	1.086		A	1.82626	0.589511	0.645358	4.9084	4.48754				A	1.82626	0.589511	0.645358	3.61742	4.54185
				B	1.74453	0.769278	0.567322	2.8204	4.99958	2.95282	1.0177		B	1.75194	0.769278	0.567322	4.77045	4.89297				B	1.75194	0.769278	0.567322	3.37152	3.8125
				C	1.55399	0.819262	0.768335	2.89437	1.064	2.52	2.91301		C	1.72921	0.819262	0.768335	4.59209	4.48902				C	1.72921	0.819262	0.768335	3.73034	3.67692
				D	2.00953	0.695733	0.703341	2.93771	1.0414	2.9405	2.744		D	1.76267	0.695733	0.703341	4.93436	4.61817				D	1.76267	0.695733	0.703341	3.47643	4.18487
				E	1.70049	0.719494	0.705835	2.84261	1.51969	2.6739	2.6141		E	1.70649	0.719494	0.705835	4.88058	4.73773				E	1.70649	0.719494	0.705835	3.7473	3.96416
				F	1.8321	0.773411	0.825309	2.17741	2.868	4.68926	1.78		F	1.49738	0.773411	0.825309	4.47219	4.90242				F	1.49738	0.773411	0.825309	3.87707	4.19524
				G	1.5637	0.785037	0.870443	1.063	2.0194	2.021	1.14893		G	1.36596	0.785037	0.870443	4.6795	4.94604				G	1.36596	0.785037	0.870443	3.94429	3.9815
	ODc	0.969608		H	1.49747	0.65551	0.708724	1.0534	4.1939	1.894	3.87		H	1.67631	0.65551	0.708724	4.36279	4.32966				H	1.67631	0.65551	0.708724	3.79807	3.98601
	2*ODc	1.93922		Mean			0.725119				2.34607		Mean			0.725119		4.68774				Mean			0.725119		3.86909
	4*ODc	3.87843		Standard Deviation			0.0814964				1.07822		Standard Deviation			0.0814964		0.206892				Standard Deviation			0.0814964		0.27885
				Acinetobacter spp. (AS027A3a)	H2O	Broth	Broth	Cells	Cells	Cells	Cells		Acinetobacter spp. (AS027A3a)	H2O	Broth	Broth	Cells	Cells				Acinetobacter spp. (AS027A3a)	H2O	Broth	Broth	Cells	Cells
				A	1.02258	0.589511	0.645358	1.57654	2.19819	1.9699	1.97564		A	2.95595	0.589511	0.645358	2.83935	3.30503				A	1.62513	0.589511	0.645358	3.32299	3.27052
				B	1.04413	0.769278	0.567322	1.80696	2.30663	2.23083	2.19523		B	2.43841	0.769278	0.567322	3.15351	3.05703				B	1.68095	0.769278	0.567322	2.85764	3.32842
				C	0.892823	0.819262	0.768335	1.6392	2.03888	1.93217	2.33297		C	1.98157	0.819262	0.768335	2.83604	3.08214				C	1.45144	0.819262	0.768335	3.62584	3.01563
				D	0.889996	0.695733	0.703341	1.57347	2.28359	2.43088	2.21866		D	2.01543	0.695733	0.703341	3.1672	3.45931				D	1.69707	0.695733	0.703341	2.57649	3.27269
				E	0.913778	0.719494	0.705835	1.65669	2.12631	2.80114	2.18435		E	1.37939	0.719494	0.705835	3.05703	2.78158				E	1.69939	0.719494	0.705835	2.77999	3.82229
				F	0.822576	0.773411	0.825309	1.47547	1.95867	2.61247	2.19765		F	1.38028	0.773411	0.825309	2.87137	3.4014				F	1.32642	0.773411	0.825309	2.82227	3.88432
				G	1.26771	0.785037	0.870443	1.46778	2.1037	2.69306	2.20777		G	1.40453	0.785037	0.870443	3.02291	2.77482				G	1.40811	0.785037	0.870443	2.90913	3.16183
	ODc	0.969608		H	1.56884	0.65551	0.708724	1.58854	1.93599	2.61388	2.47386		H	1.79091	0.65551	0.708724	3.43004	3.40452				H	1.38747	0.65551	0.708724	2.72569	3.89536
	2*ODc	1.93922		Mean			0.725119				2.08772		Mean			0.725119		3.10271				Mean	1.5345		0.725119		3.20444
	4*ODc	3.87843		Standard Deviation			0.0814964				0.354985		Standard Deviation			0.0814964		0.234237				Standard Deviation	0.146232		0.0814964		0.413222

## Sheet: Graph
		Species	Biofilm
			24 h		48h		72h
			Mean	Standard Deviation	Mean	Standard Deviation	Mean	Standard Deviation
		Acinetobacter spp. AS027A3a	2.1	0.4	3.1	0.2	3.2	0.4
		K. pneumoniae AS027A2	2.3	1.2	4.7	0.2	3.9	0.3
		P. fluorescens AS008A1	1.7	0.2	1.2	0	1.2	0.3
		S. putrefaciens AS006C2	1.7	0.3	3.1	0.2	3.4	0.7
		Reference	Species	Biofilm (24h)	Biofilm (48h)	Biofilm (72h)
		AS006C2	Shewanella putrefacies	(+)	(++)	(++)
		AS008A1	Pseudomonas fluorescens	(+)	(+)	(+)
		AS027A2	Klebsiella pneumoniae	(++)	(+++)	(+++)
		AS027A3a	Acinetobacter spp.	(++)	(++)	(++)
