# Supplementary material for: Biofilms and antibiotic susceptibility of multidrug-resistant bacteria from wild animals
Source: PeerJ. 2018 Jun 12;6:e4974. doi: 10.7717/peerj.4974 (PMC6003395; doi:10.7717/peerj.4974)
Supplement: Supplemental Information 3 [file peerj-06-4974-s004.xlsx]

## Sheet: Sheet1
		Bacteria		Contact angle θ			Surface tension Parameters (mJ/cm2)			Hydrophobicity (mJ/cm2)	Free energy of adhesion (mJ/cm2)	Contact angle θ						Surface tension Parameters (mJ/cm2)						Hydrophobicity (mJ/cm2)		Free energy od adhesion (mJ/cm2)
				θw	θB	θF	ϒLW	ϒ+	ϒ-			Mean θw	Standard Deviation θw	Mean θB	Standard Deviation θB	Mean θF	Standard Deviation θF	Mean ϒLW	Standard Deviation ϒLW	Mean ϒ+	Standard Deviation ϒ+	Mean ϒ-	Standard Deviation ϒ-	Mean	Standard Deviation	Mean	Standard Deviation
		Shewanella putrefaciens	1 st Experiment	23.4371	51.8488	20.3957	29.0496	3.67768	47.9395	22.4398	4.7	23.4371	0	51.9475	0.09875	20.3171	0.0785695	29.0009	0.0487004	3.69601	0.0183351	47.9313	0.00815165	22.4097	0.0301461	4.75	0.05
			2 nd Experiment	23.4371	52.0463	20.2386	28.9522	3.71435	47.9232	22.3795	4.8
		Pseudomonas fluorescens	1 st Experiment	22.645	18.7229	43.5438	42.0815	0	69.9136	60.2826	8.4	22.6367	0.008335	18.7557	0.032855	43.4675	0.07625	42.0736	0.00796949	0	0	69.8287	0.0848134	60.1845	0.0980398	8.45	0.05
			2 nd Experiment	22.6283	18.7886	43.3912	42.0656	0	69.7439	60.0865	8.5
		Klebsiella pneumoniae	1 st Experiment	15.0278	35.0667	12.5043	36.7064	1.86603	51.9194	27.9033	3.4	14.775	0.252735	34.17	0.89667	12.3796	0.124645	37.063	0.356544	1.78739	0.0786471	52.0704	0.15097	28.1474	0.244105	2.8	0.6
			2 nd Experiment	14.5223	33.2733	12.255	37.4195	1.70874	52.2213	28.3915	2.2
		Acinetobacter sp.	1 st Experiment	18.3962	27.2167	21.2892	39.6202	0.801794	53.8198	32.7106	2.2	18.0665	0.32979	26.6142	0.6025	21.85	0.5608	39.8183	0.198069	0.730008	0.0717863	54.4161	0.596345	33.6775	0.966945	2.4	0.2
			2 nd Experiment	17.7367	26.0117	22.4108	40.0164	0.658221	55.0125	34.6445	2.6
